# Supplementary material
Source: publisher figshare collection journal article supplement (https://tandf.figshare.com/articles/dataset/_/3219310)
Supplement: Supplementary file 1 [file 1]

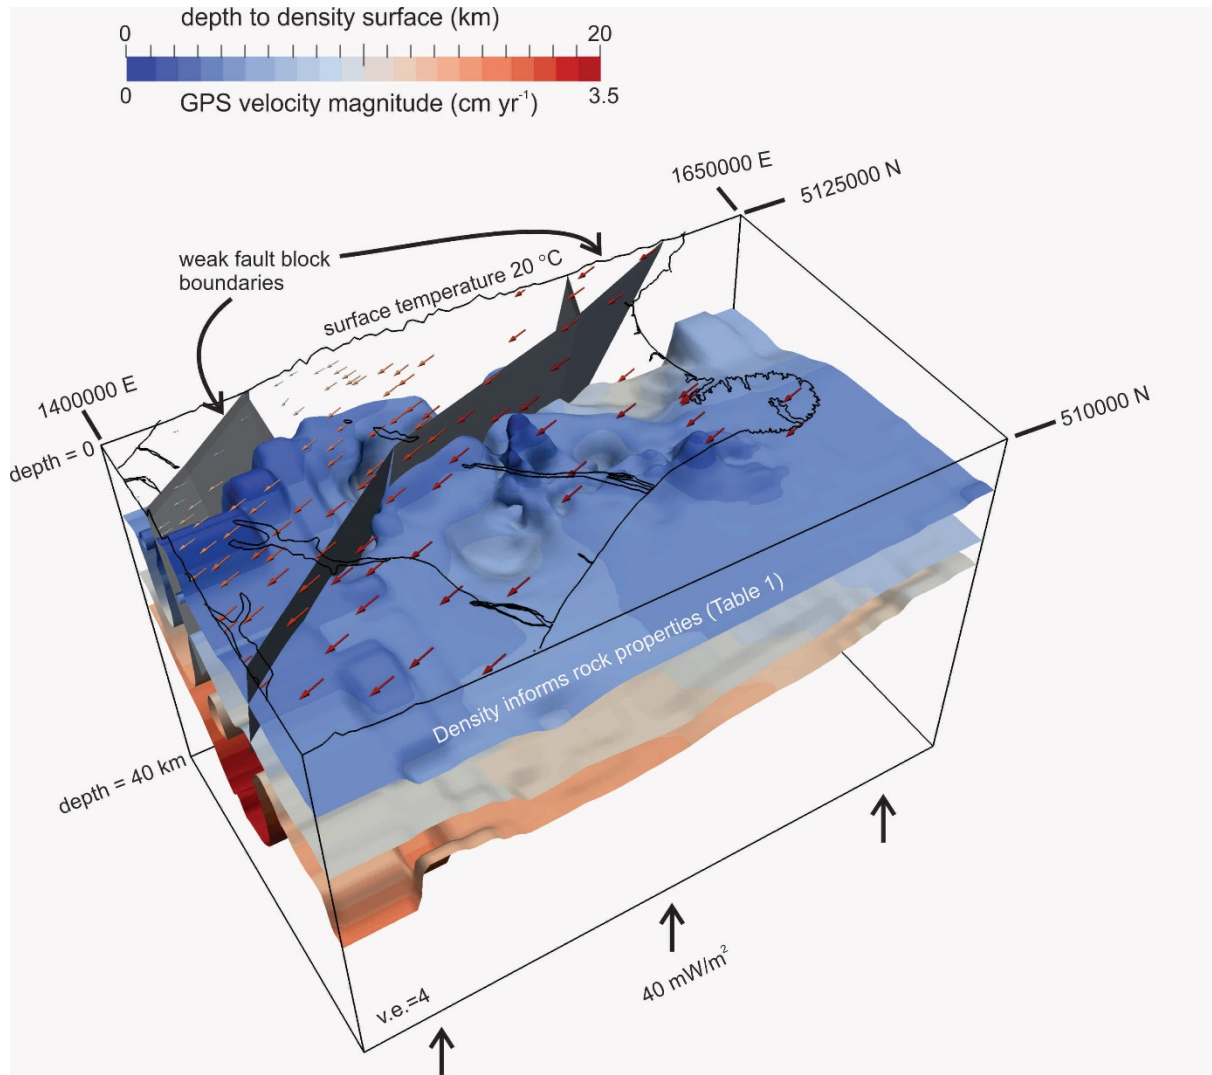

**Figure S1.** Setup of the numerical model (SULEC) used to compute regional long-term stresses (Ellis et al. 2011; Buiter & Ellis 2012). Perspective view showing density isosurfaces ( $2700$ ,  $2800$ , and  $2900 \text{ kgm}^{-3}$  with colours indicating depth) which are prescribed based on the NZ seismic velocity model for Canterbury (Eberhart-Phillips et al. 2010; Reyners et al. 2014). Figure vertical exaggeration  $\times 4$ . Material properties are listed in Table S1. Grid spacing is  $2 \text{ km}$  horizontally and vertically giving a total of  $187,500$  elements. The base (at  $40 \text{ km}$  depth) is fixed vertically but allowed to move freely in the horizontal direction. The top of the model is a free surface and gravity is included. The finite element mesh at the surface conforms to the surface topography from  $90\text{m}$  resolution SRTM data, but bathymetry is not represented. We assume uniform basal heat-flow, average radiogenic heat production of  $1.8 \mu\text{W m}^{-3}$  and thermal conductivity of  $2.5 \text{ Wm}^{-1}\text{K}^{-1}$  (Pandey, 1981). Average surface heat-flow predicted by the model is  $56 \text{ mW m}^{-2}$ , similar to values compiled for northern Canterbury by Pandey (1981) and Funnell & Allis (1996). Grey dipping polygons indicate imposed frictionally weak fault zones based on simplified block boundaries from Wallace et al. (2007); the Alpine fault has dip of  $45^\circ\text{SE}$ ; PPAFZ  $45^\circ\text{NW}$ . The vectors show GPS velocities from campaign data (1995-2012; Wallace et al., 2012), a smoothed and interpolated version of which were used to constrain boundary conditions on the sides of the model.
