# Supplementary material
Source: publisher figshare collection journal article supplement (https://tandf.figshare.com/articles/dataset/_/3219310)
Supplement: Supplementary file 2 [file 1]

**Table S1.** Rock properties used in paper and their relationship to seismic velocity.

| <i>Typical rock type</i>                                 | Sediment    | Greywacke      | Schist         | Basalt         | Peridotite     | Eclogite      |
|----------------------------------------------------------|-------------|----------------|----------------|----------------|----------------|---------------|
| Density<br>$\text{kgm}^{-3}$                             | $\leq 2500$ | $2640 \pm 100$ | $2730 \pm 115$ | $2770 \pm 160$ | $3090 \pm 225$ | $3550 \pm 50$ |
| Calculated or measured<br>$V_p^{(1)}$<br>$\text{km/sec}$ | $\leq 4.3$  | 5.5            | 6              | 6.1            | 7.1            | 8.4           |
| Calculated<br>$V_s^{(2)}$ $\text{km/sec}$                | $\leq 2.6$  | 3.3            | 3.6            | 3.7            | 4.3            | 5.0           |
| Calculated shear modulus <sup>(3)</sup><br>$\text{GPa}$  | $\leq 17$   | 29             | 35             | 38             | 57             | 90            |
| Assumed friction coefficient                             | 0.75        | 0.75           | 0.75           | 0.75           | 0.75           | 0.75          |
| Ductile creep parameters based on <sup>(4)</sup>         | Quartz      | Quartz         | Feldspar       | Gabbro         | Olivine        | Olivine       |

The top row lists density ranges of sediment, greywacke, schist, basalt and peridotite from Tenzer et al. (2011) and for mafic eclogite (Christensen 1996). Calculated  $V_p$  (1) use the relationship in Hill (1978) for  $V_p < 5.5$  km/sec and in Gardner et al. (1974) for  $V_p > 5.5$  km/s (Eberhart-Phillips et al. 2010). (2) The table assumes a constant  $V_p/V_s$  ratio of 1.65 (typical for most regions, however see Eberhart-Phillips et al. 2010). (3) Shear modulus =  $\rho V_s^2$ . (4) Quartz dislocation creep (Paterson & Luan 1990) up to density  $2750 \text{ kg m}^{-3}$ ; feldspar (wet anorthite) combined diffusion and dislocation creep (Rybacki et al., 2006) up to  $2900 \text{ kg m}^{-3}$ ; gabbro dislocation creep (Wilks and Carter, 1990) from  $2900\text{-}3000 \text{ kg m}^{-3}$ ; wet olivine dislocation creep for all greater densities (Hirth & Kohlstedt 2003).
