# Supplementary material
Source: publisher figshare collection journal article supplement (https://tandf.figshare.com/articles/dataset/_/3219310)
Supplement: Supplementary file 3 [file 1]

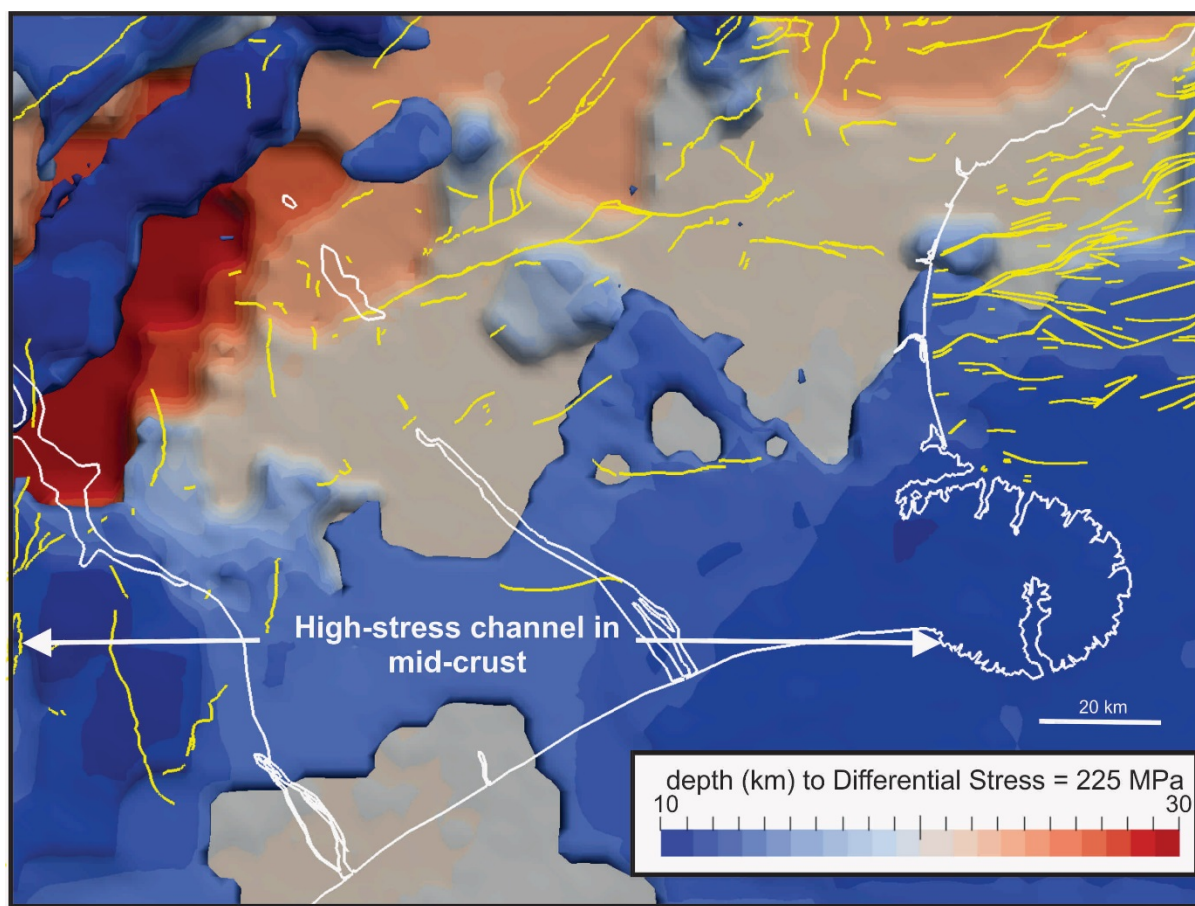

**Figure S2.** Differential stress = 225 MPa isosurface predicted by the regional stress model coloured by depth. North of Darfield, high stresses are not attained until depths of over 18 km owing to ductile flow in the mid-crust, whereas Banks Peninsula and the region west of it have high stresses at depths of 10-15 km.
