# Supplementary material
Source: publisher figshare collection journal article supplement (https://tandf.figshare.com/articles/dataset/_/3219310)
Supplement: Supplementary file 4 [file 1]

## **References S1.** Additional references.

- Christensen, NI 1996. Poisson's ratio and crustal seismology. *Journal of Geophysical Research* 101: 3139-3156.
- Gardner GHF, Gardner LW, Gregory AR 1974. Formation velocity and density-the diagnostic basics for stratigraphic traps. *Geophysics* 39: 770-780.
- Hill DP 1978: Seismic evidence for the structure and Cenozoic tectonics of the Pacific Coast States. *Geological Society of America Memoirs* 152: 145-174.
- Hirth G, Kohlstedt D 2003. Rheology of the upper mantle and the mantle wedge: A view from the experimentalists. *Inside the Subduction Factory*, 83-105.
- Paterson MS, Luan FC 1990. Quartzite rheology under geological conditions. *Geological Society, London, Special Publications*, 54: 299-307.
- Rybacki E, Gottschalk M, Wirth R, Dresen G. 2006: Influence of water fugacity and activation volume on the flow properties of fine-grained anorthite aggregates. *Journal of Geophysical Research* 111: doi:10.1029/2005JB003663.
- Tenzer R, Sirguey P, Rattenbury M, Nicolson J 2011. A digital rock density map of New Zealand. *Computers & Geosciences* 37: 1181-1191.
- Wilks KR, Carter NL 1990: Rheology of some continental lower crustal rocks. *Tectonophysics* 182: 57-77.
