# Supplementary material
Source: publisher figshare collection journal article supplement (https://tandf.figshare.com/articles/dataset/_/3219310)
Supplement: Supplementary file 5 [file 1]

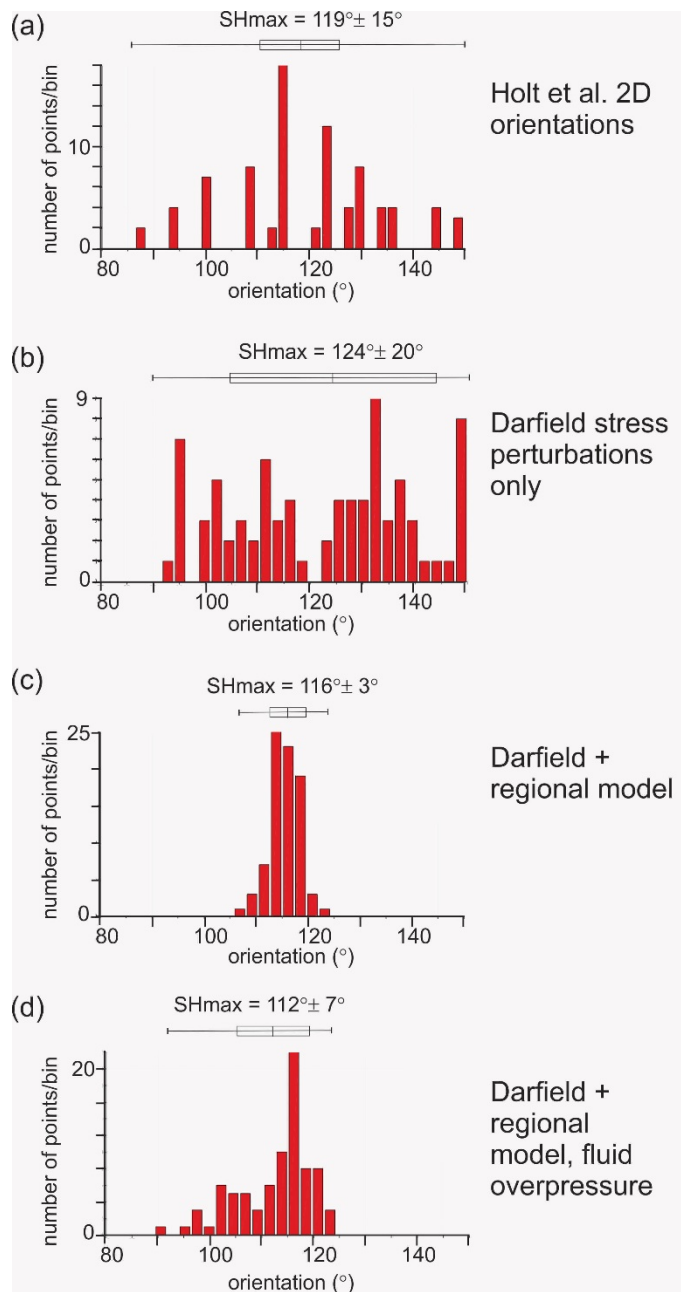

**Figure S3.** Histograms showing the distribution in SHmax orientations at the station locations of Holt et al. (2013) analysis and the models in this paper. (a) Holt et al. (2013) 2D averaged SHmax directions. (b) Modelled SHmax distribution for earthquake stresses only. (c) Modelled SHmax distribution for regional plus earthquake stresses. (d) Same as c), but assuming near-lithostatic fluid pressures in the crust, reducing the relative magnitude of regional stresses cf. earthquake stress perturbations. Orientations shown in c), d) and e) are computed at a model depth of 6.5 km
